# Supplementary material
Source: PubMed Central journal article supplement (PMC7391255)
Supplement: ao0c00953_si_001.pdf [file ao0c00953_si_001.pdf]

# Supporting Information

## Electrochemical Synthesis of Sulfinate Esters: Nickel (II)-Catalyzed Oxidative-Esterification of Thiols with Alcohols in an Undivided Cell

*Babak Kaboudin,<sup>\*,[a]</sup> Leila Behrouzi,<sup>[a]</sup> Foad Kazemi,<sup>[a]</sup> Mohammad M. Najafpour<sup>[a]</sup> and Hiroshi Aoyama<sup>[b]</sup>*

<sup>a</sup> Department of Chemistry, Institute for Advanced Studies in Basic Sciences, Gava zang, Zanjan, Iran

<sup>b</sup>School of Pharmacy, Tokyo University of Pharmacy and Life Sciences, Horinouchi, Hachioji, Tokyo 192-0392,  
Japan

E-mail: [kaboudin@iasbs.ac.ir](mailto:kaboudin@iasbs.ac.ir)

### Table of Contents

|                                                         |        |
|---------------------------------------------------------|--------|
| NMR Spectra for the compounds <b>3a-3k</b> and <b>4</b> | S3-S14 |
| Figure S1: <sup>1</sup> H NMR Spectra of <b>3a</b>      |        |
| Figure S2: <sup>13</sup> C NMR Spectra of <b>3a</b>     |        |
| Figure S3: <sup>1</sup> H NMR Spectra of <b>3b</b>      |        |
| Figure S4: <sup>13</sup> C NMR Spectra of <b>3b</b>     |        |
| Figure S5: <sup>1</sup> H NMR Spectra of <b>3c</b>      |        |
| Figure S6: <sup>13</sup> C NMR Spectra of <b>3c</b>     |        |
| Figure S7: <sup>1</sup> H NMR Spectra of <b>3d</b>      |        |
| Figure S8: <sup>13</sup> C NMR Spectra of <b>3d</b>     |        |
| Figure S9: <sup>1</sup> H NMR Spectra of <b>3e</b>      |        |
| Figure S10: <sup>13</sup> C NMR Spectra of <b>3e</b>    |        |
| Figure S11: <sup>1</sup> H NMR Spectra of <b>3f</b>     |        |

Figure S12:  $^{13}\text{C}$  NMR Spectra of **3f**

Figure S13:  $^1\text{H}$  NMR Spectra of **3g**

Figure S14:  $^{13}\text{C}$  NMR Spectra of **3g**

Figure S15:  $^1\text{H}$  NMR Spectra of **3h**

Figure S16:  $^{13}\text{C}$  NMR Spectra of **3h**

Figure S17:  $^1\text{H}$  NMR Spectra of **3i**

Figure S18:  $^{13}\text{C}$  NMR Spectra of **3i**

Figure S19:  $^1\text{H}$  NMR Spectra of **3j**

Figure S20:  $^{13}\text{C}$  NMR Spectra of **3j**

Figure S21:  $^1\text{H}$  NMR Spectra of **3k**

Figure S22:  $^{13}\text{C}$  NMR Spectra of **3k**

Figure S23:  $^1\text{H}$  NMR Spectra of **4a**

Figure S24:  $^{13}\text{C}$  NMR Spectra of **4a**

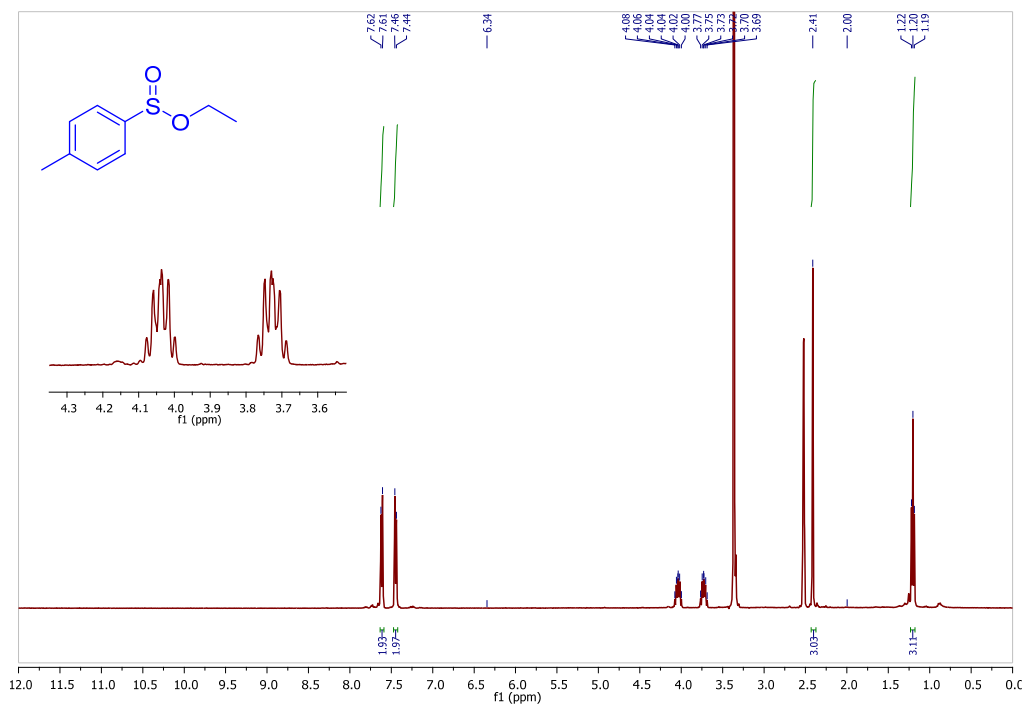

Figure S1: <sup>1</sup>H NMR Spectra of **3a**

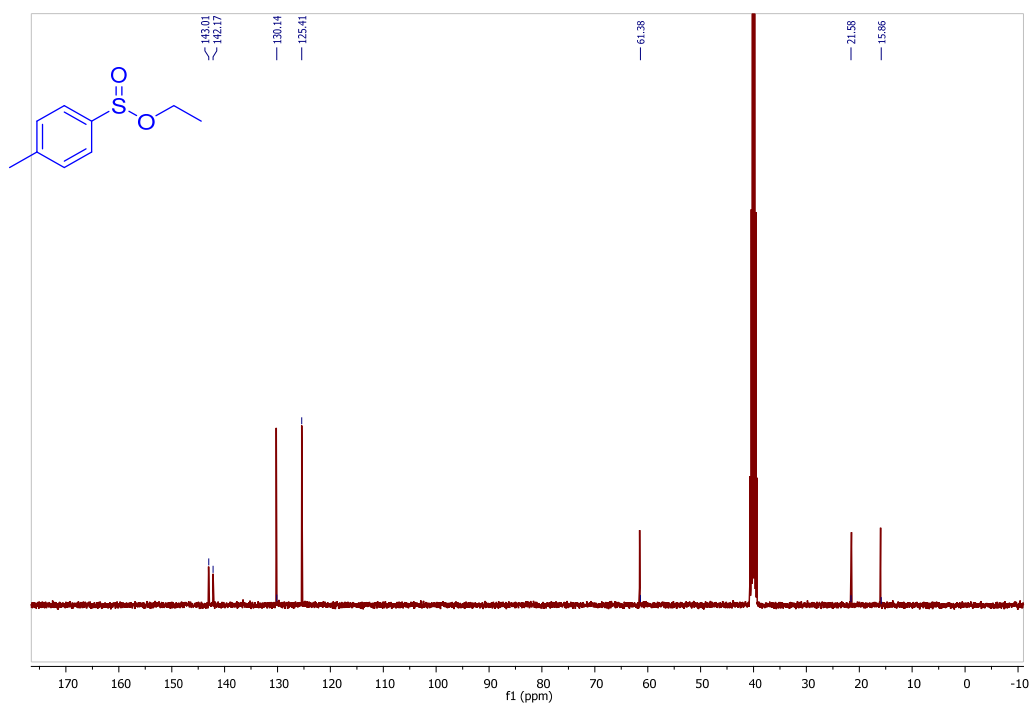

Figure S2: <sup>13</sup>C NMR Spectra of **3a**

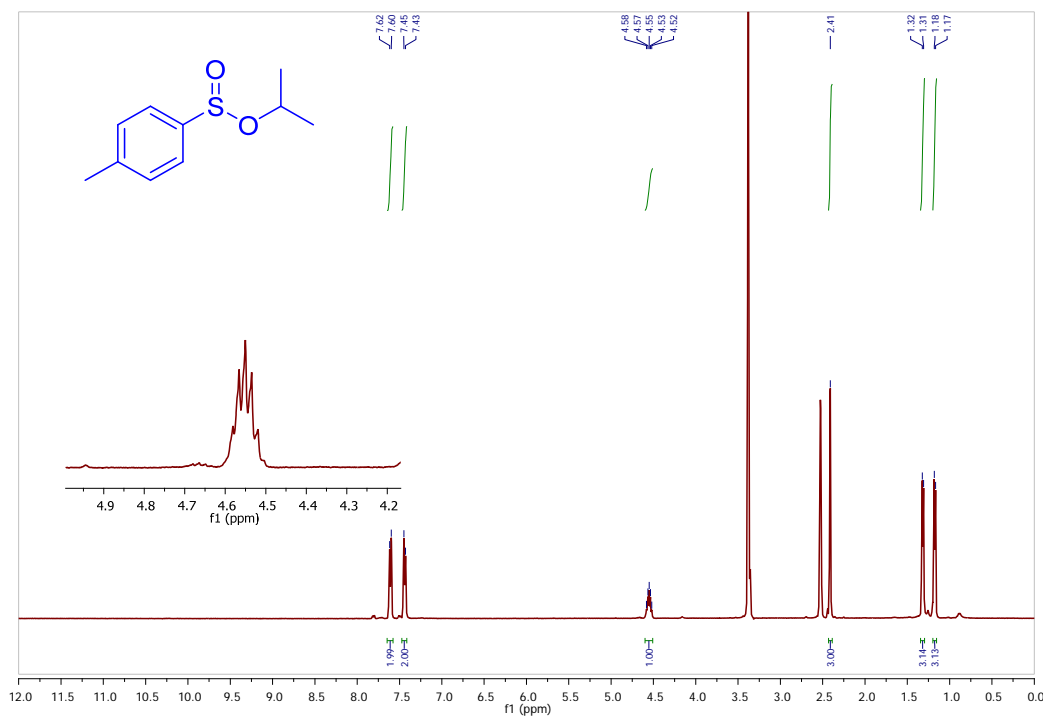

Figure S3:  $^1\text{H}$  NMR Spectra of **3b**

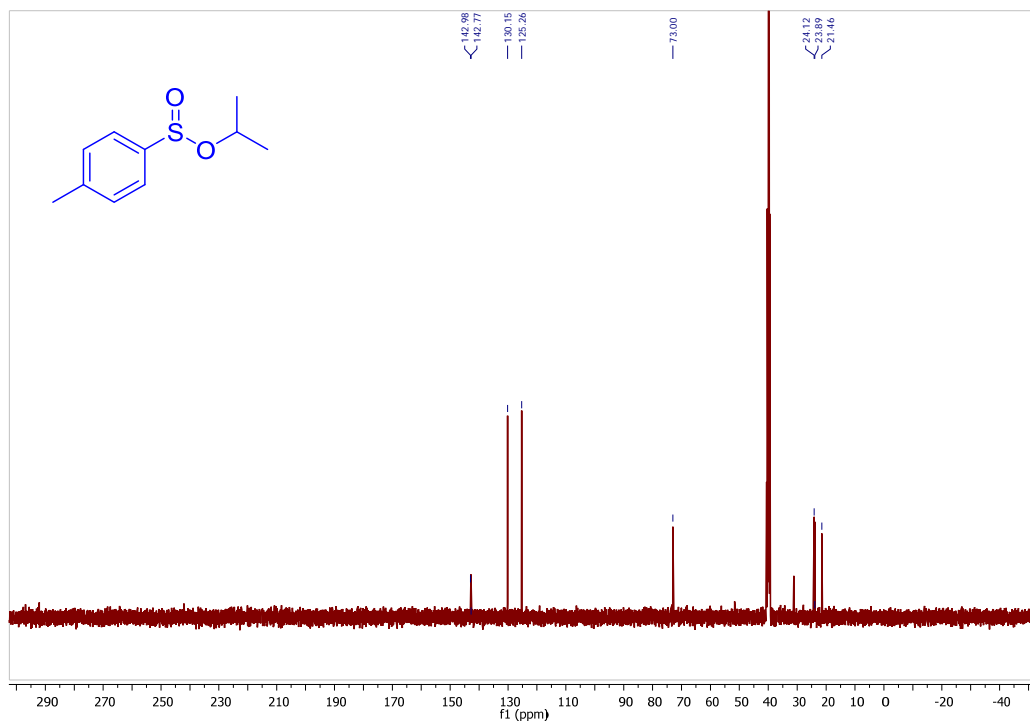

Figure S4:  $^{13}\text{C}$  NMR Spectra of **3b**

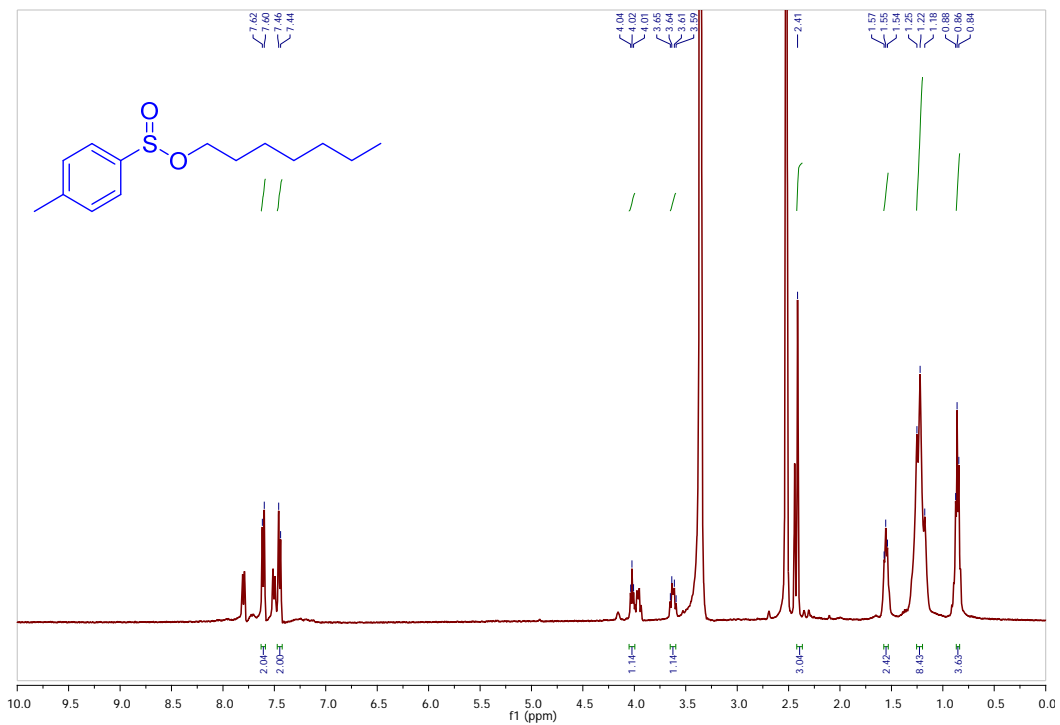

Figure S5:  $^1\text{H}$  NMR Spectra of **3c**

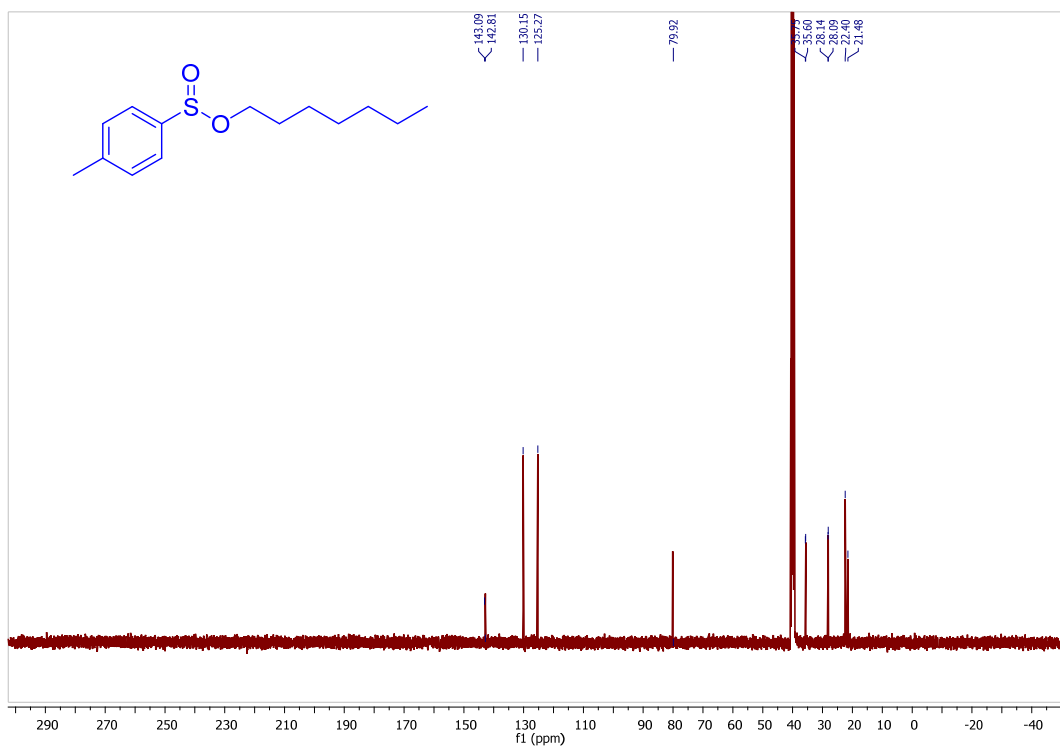

Figure S6:  $^{13}\text{C}$  NMR Spectra of **3c**

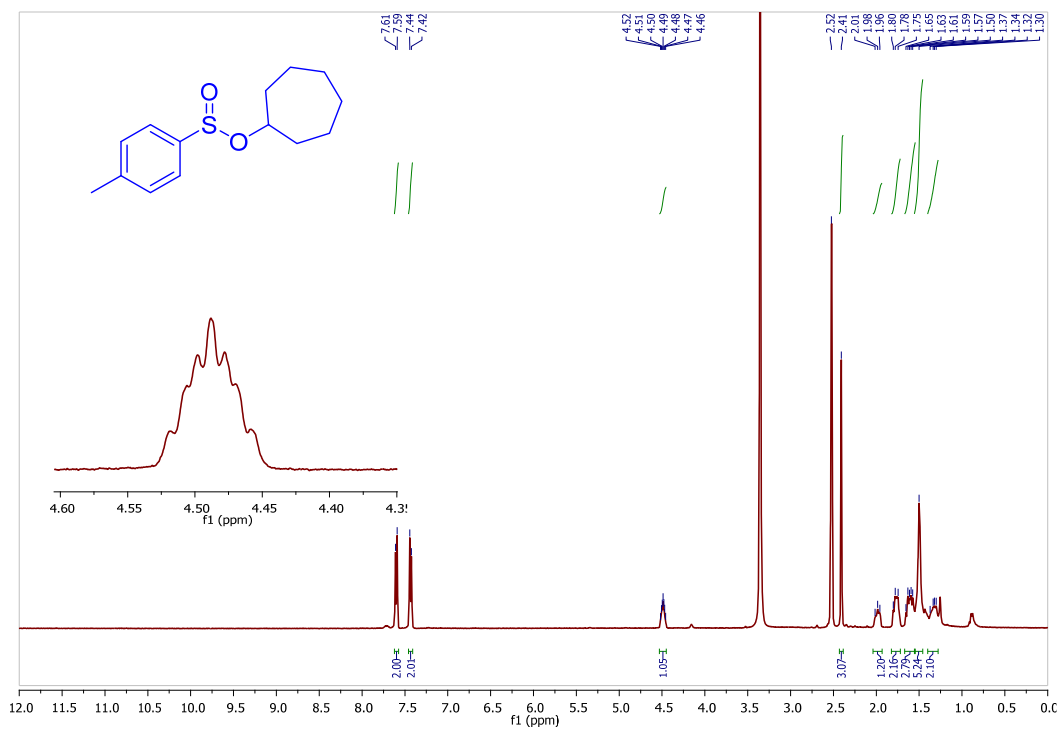

Figure S7:  $^1\text{H NMR}$  Spectra of **3d**

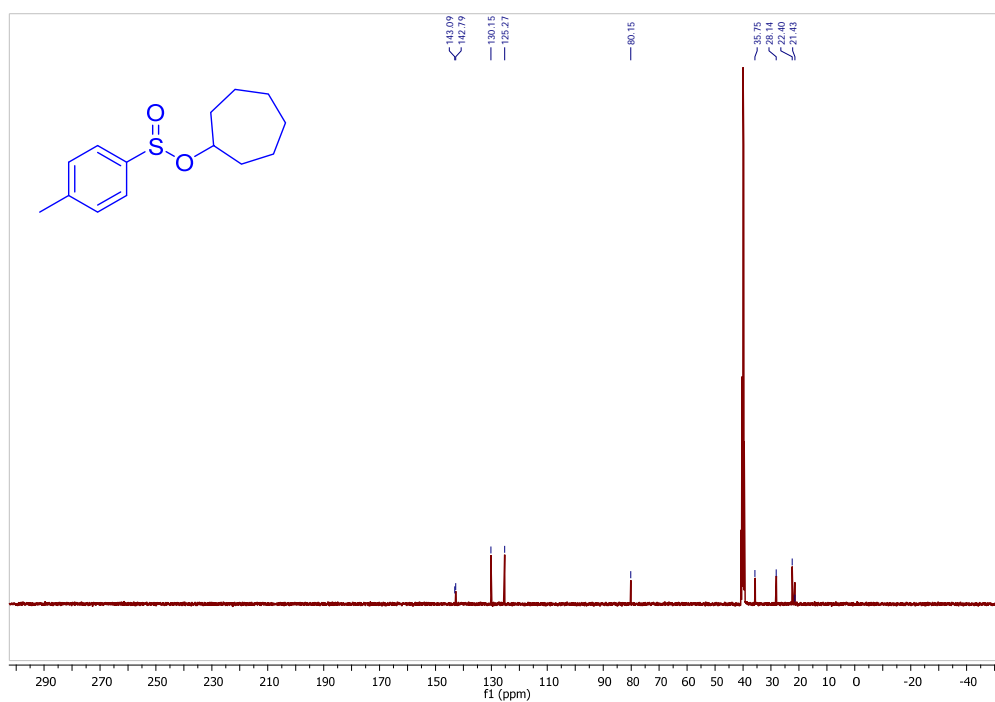

Figure S8:  $^{13}\text{C NMR}$  Spectra of **3d**

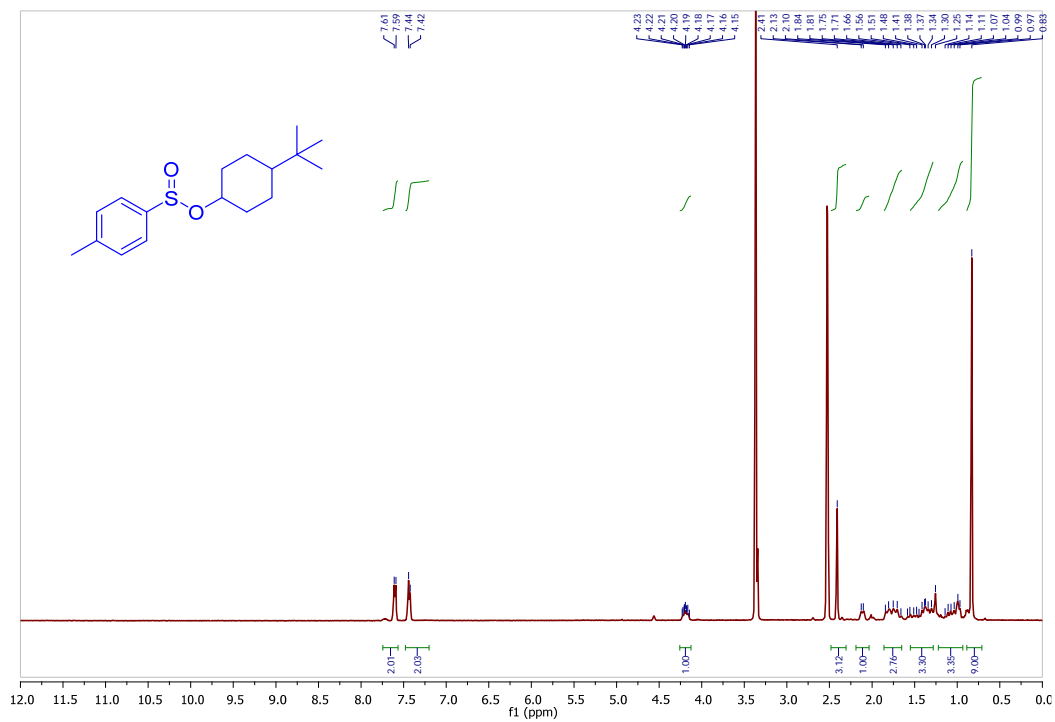

Figure S9: <sup>1</sup>H NMR Spectra of **3e**

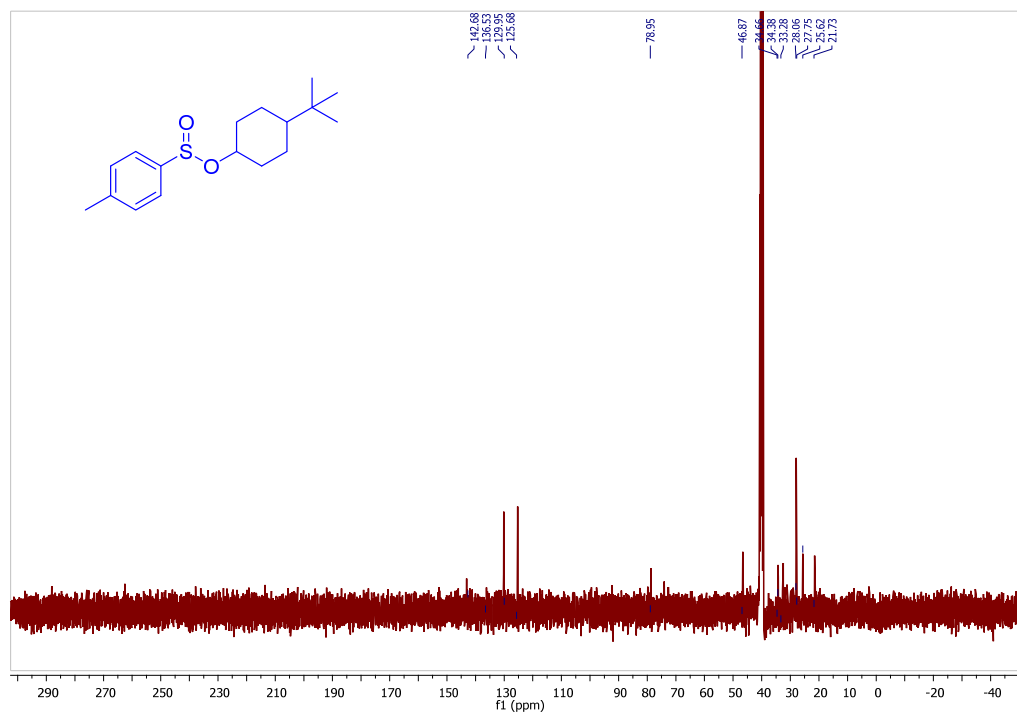

Figure S10: <sup>13</sup>C NMR Spectra of **3e**

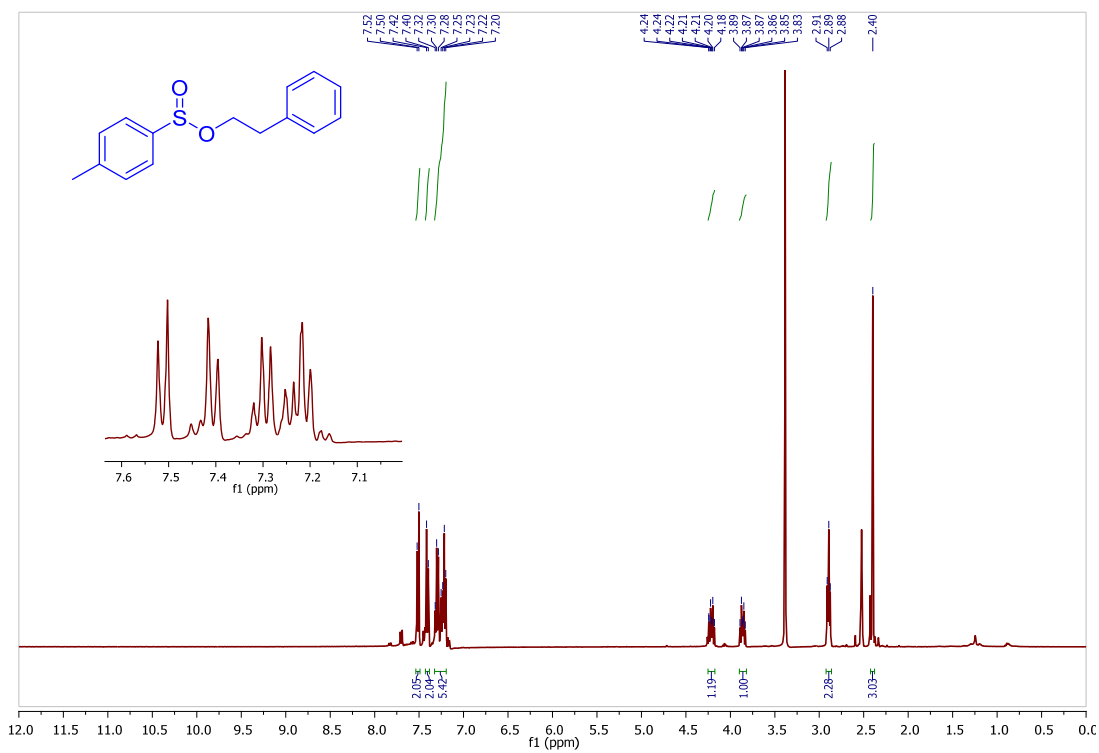

Figure S11: <sup>1</sup>H NMR Spectra of **3f**

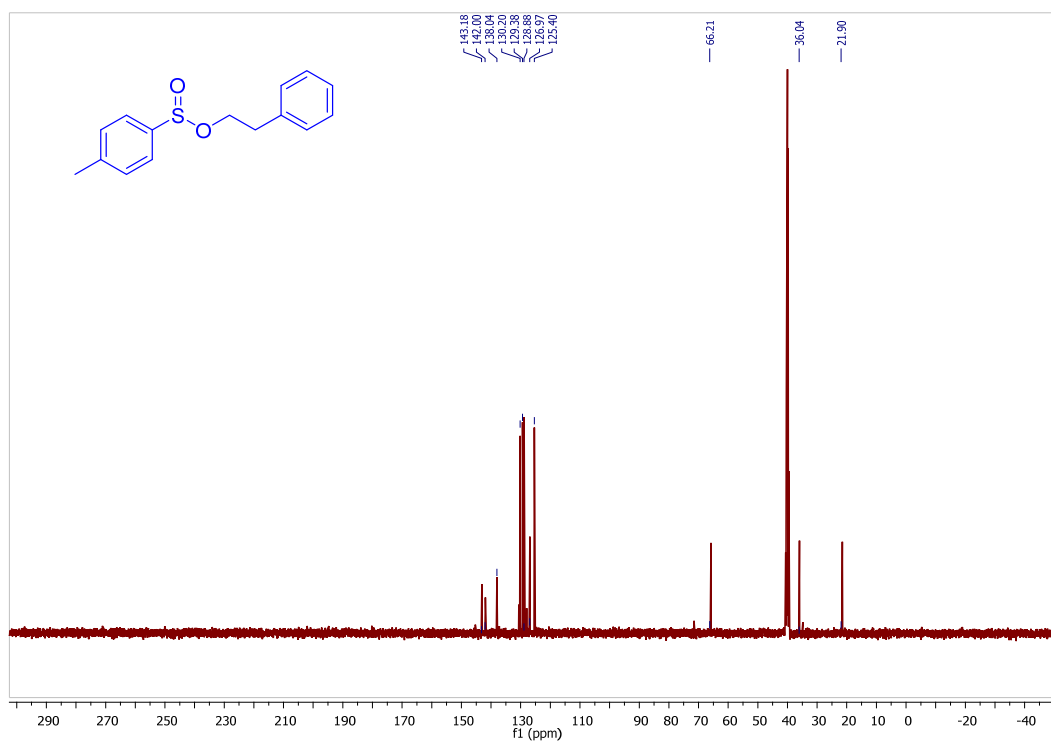

Figure S12: <sup>13</sup>C NMR Spectra of **3f**



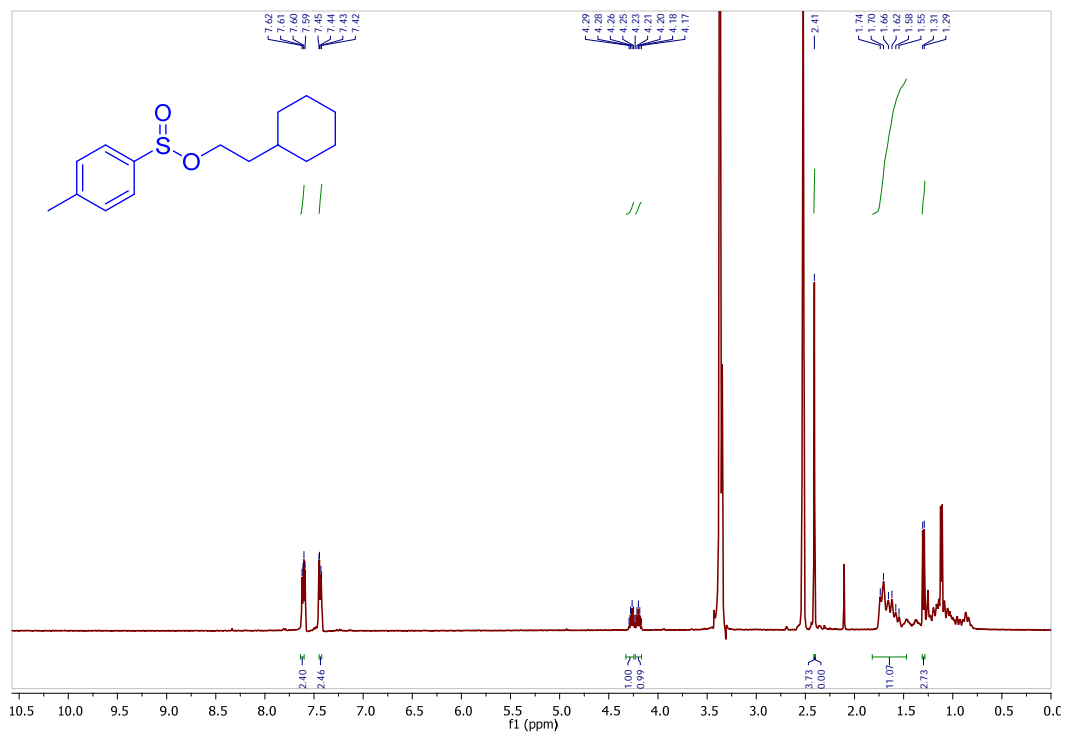

Figure S13:  $^1\text{H}$  NMR Spectra of **3g**

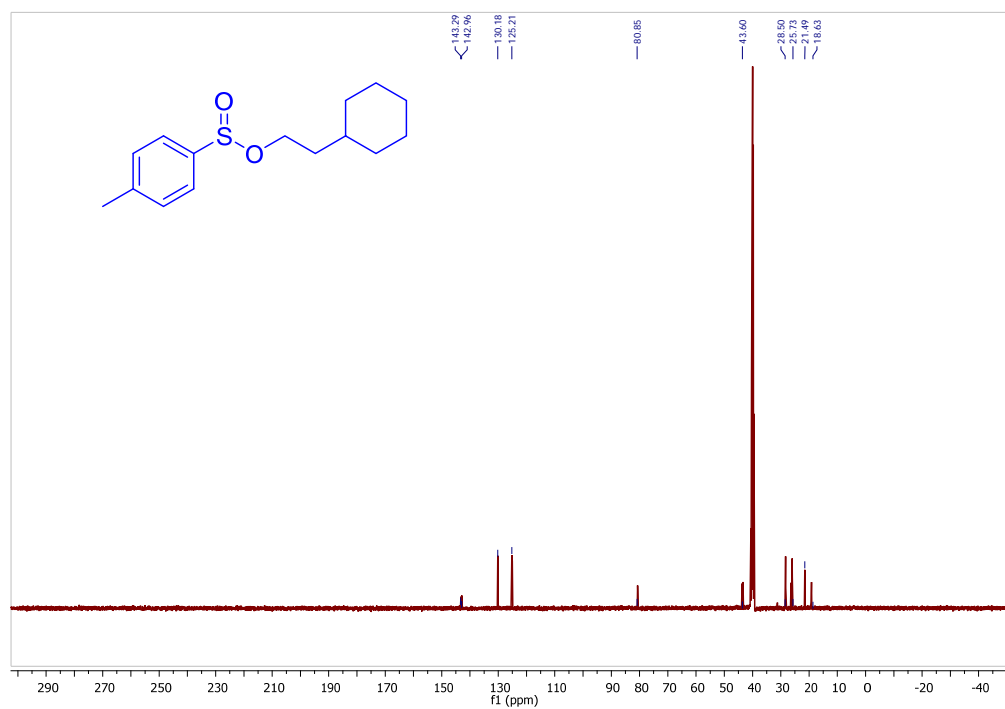

Figure S14:  $^{13}\text{C}$  NMR Spectra of **3g**

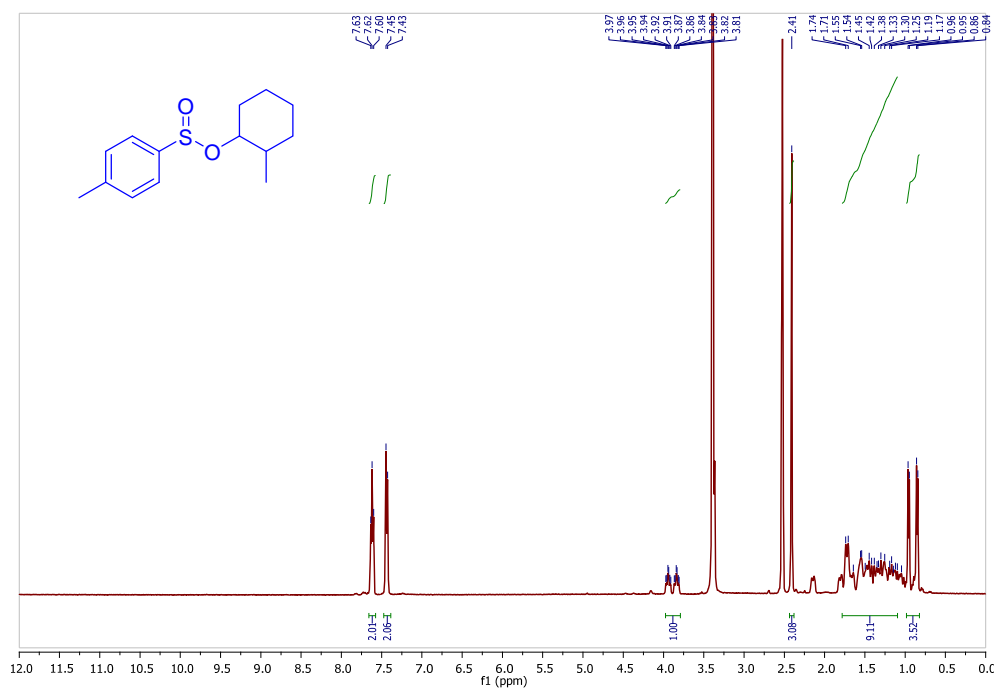

Figure S15:  $^1\text{H}$  NMR Spectra of **3h**

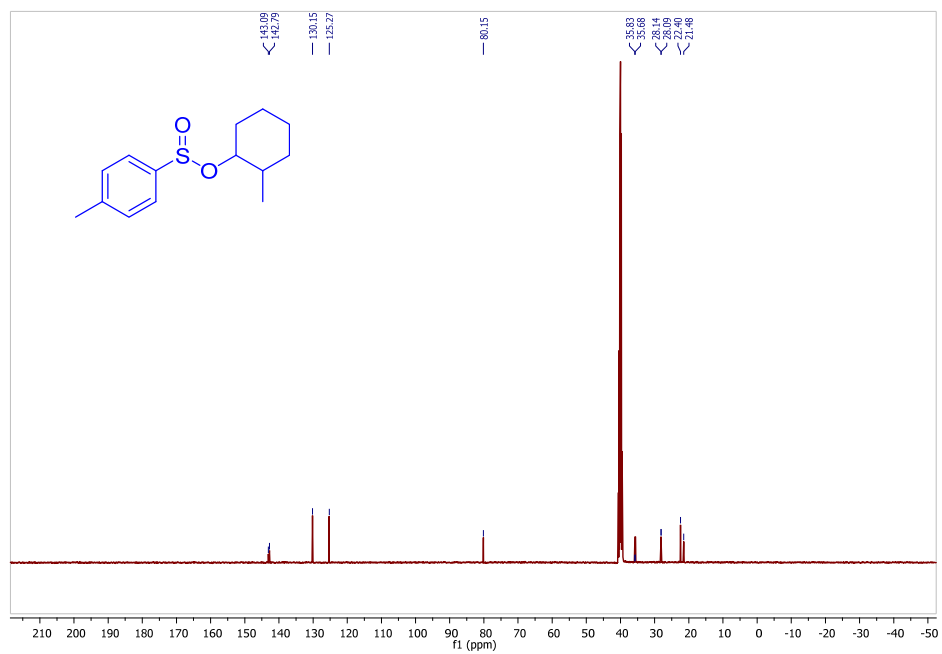

Figure S16:  $^{13}\text{C}$  NMR Spectra of **3h**

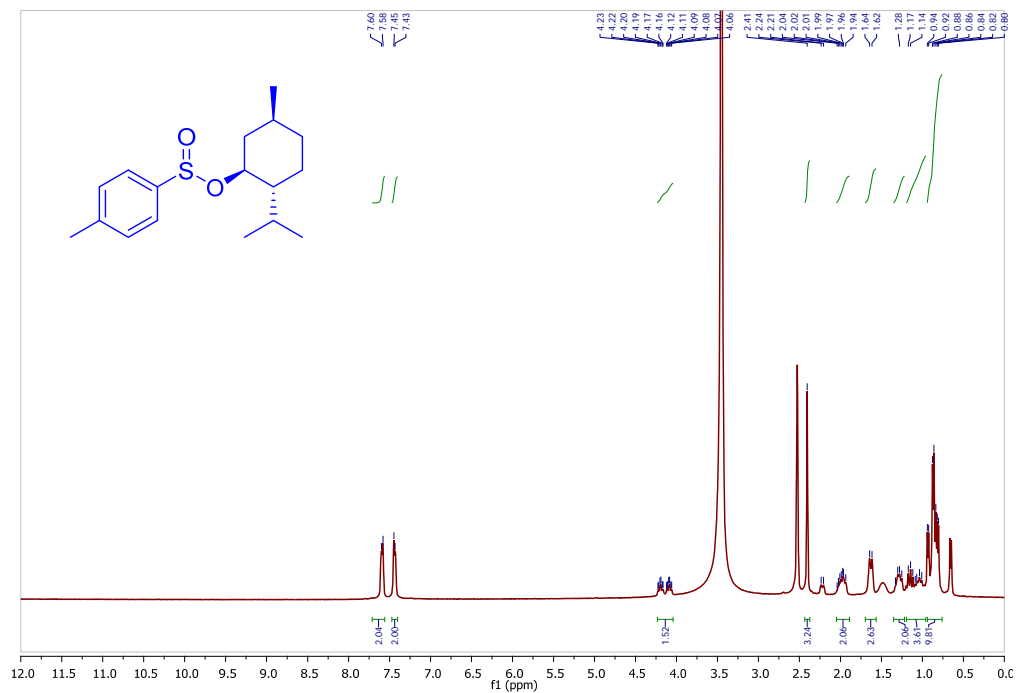

Figure S17: <sup>13</sup>C NMR Spectra of **3i**

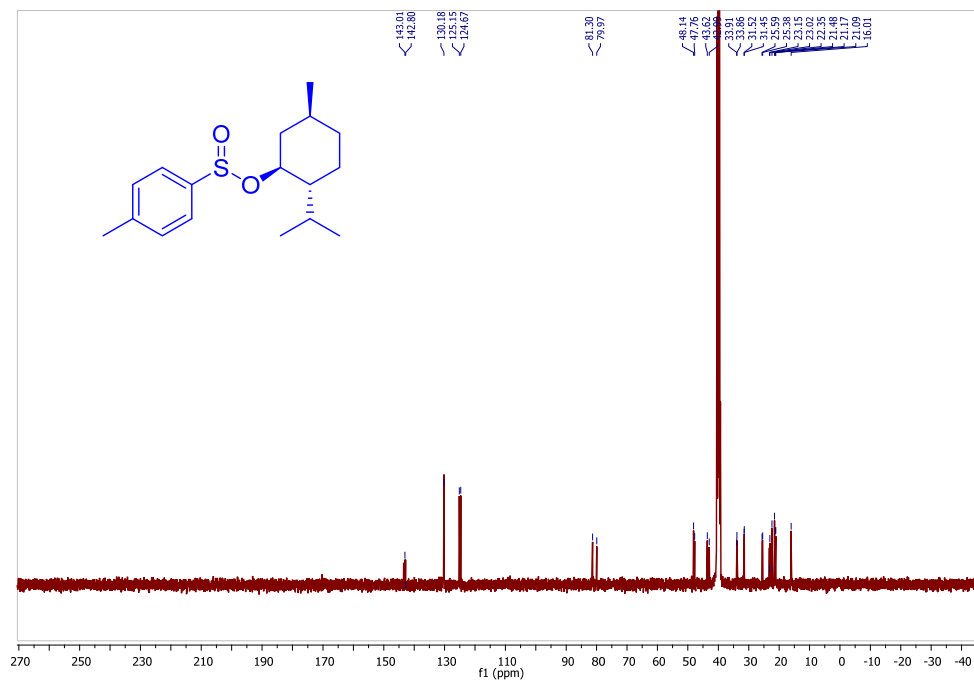

Figure S18: <sup>13</sup>C NMR Spectra of **3i**

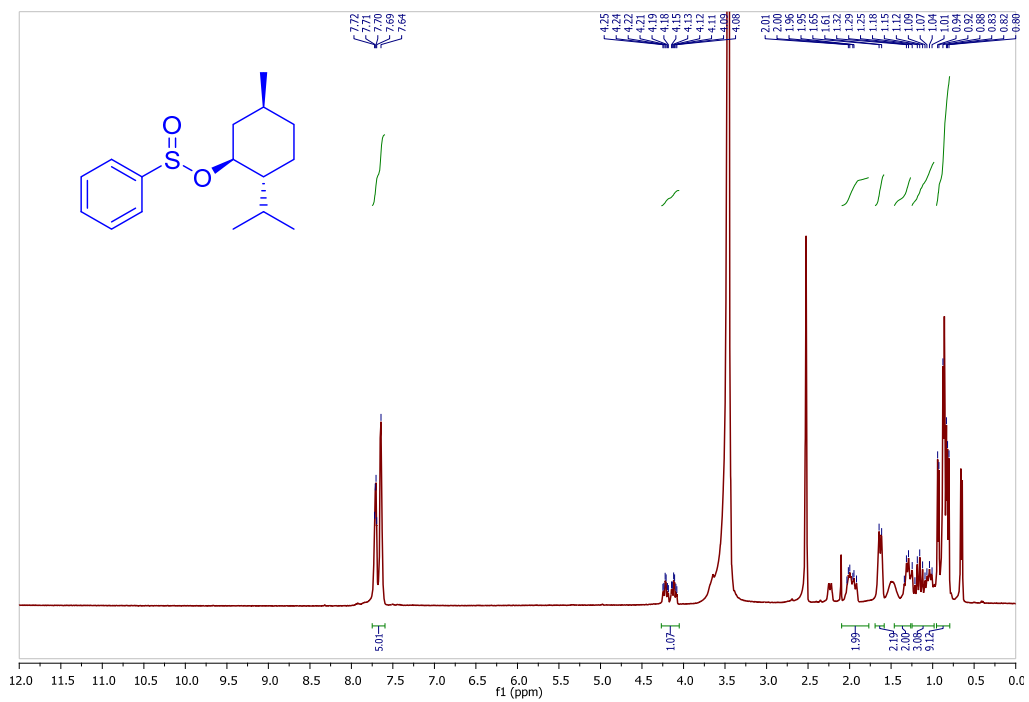

Figure S19: <sup>1</sup>H NMR Spectra of **3j**

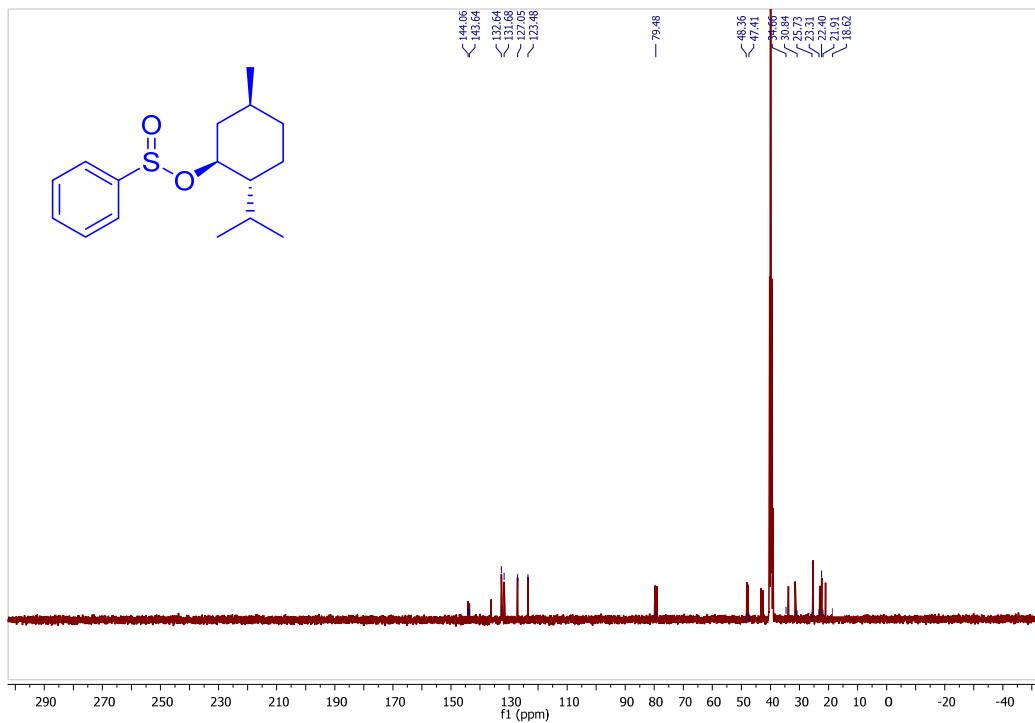

Figure S20: <sup>13</sup>C NMR Spectra of **3j**

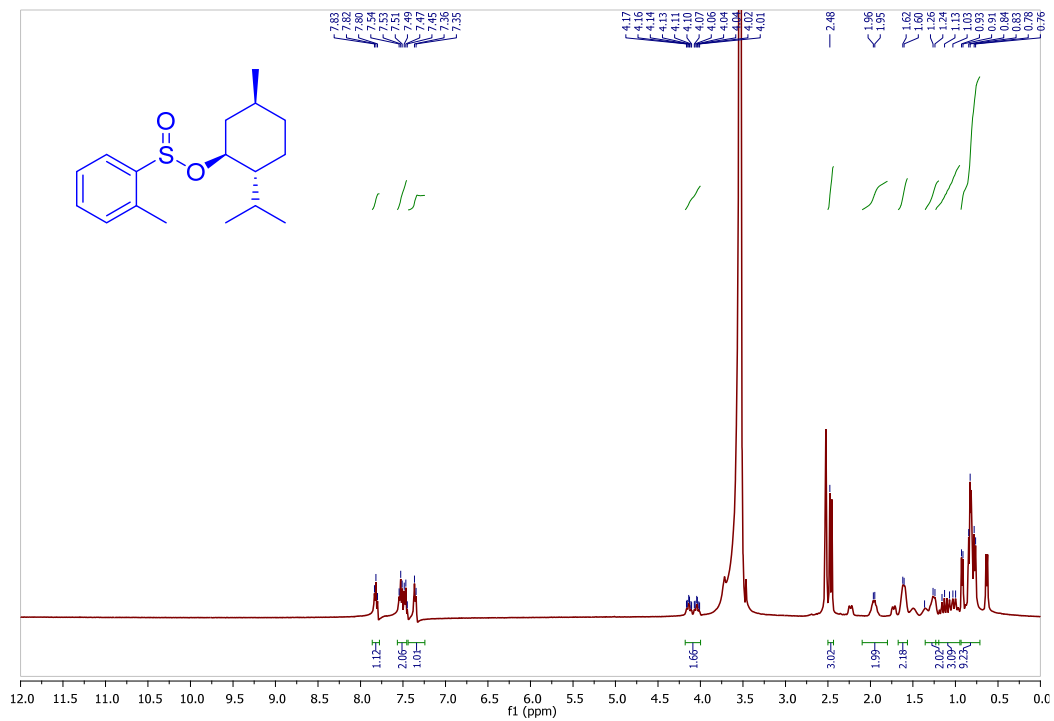

Figure S21:  $^1\text{H}$  NMR Spectra of **3k**

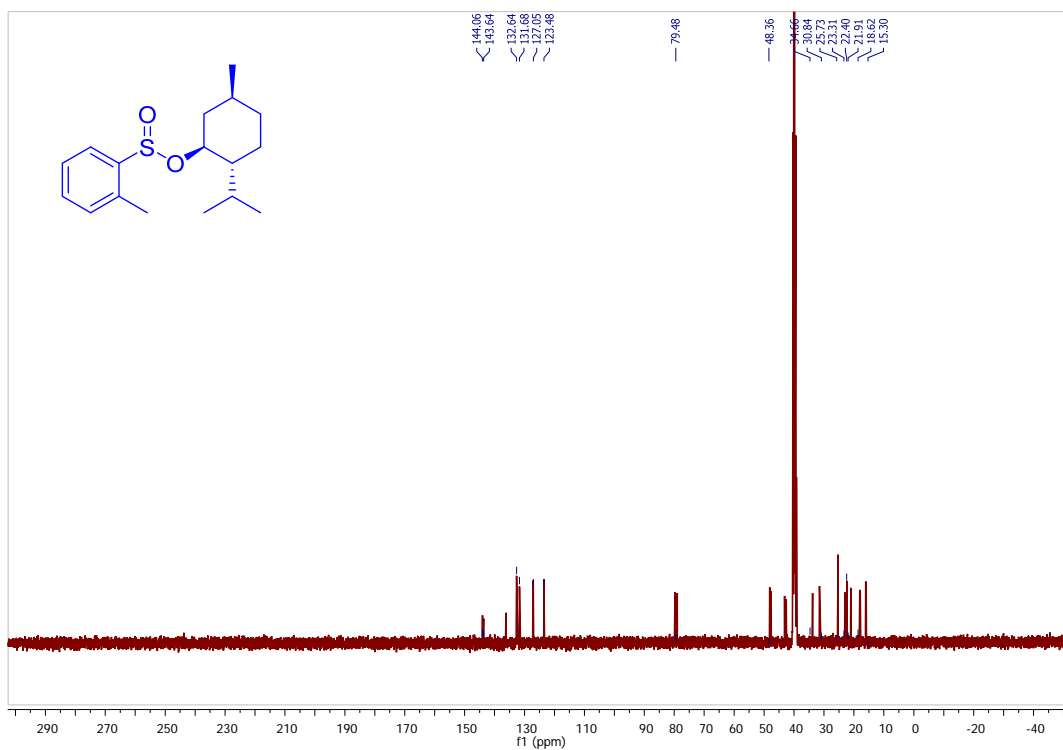

Figure S22:  $^{13}\text{C}$  NMR Spectra of **3k**

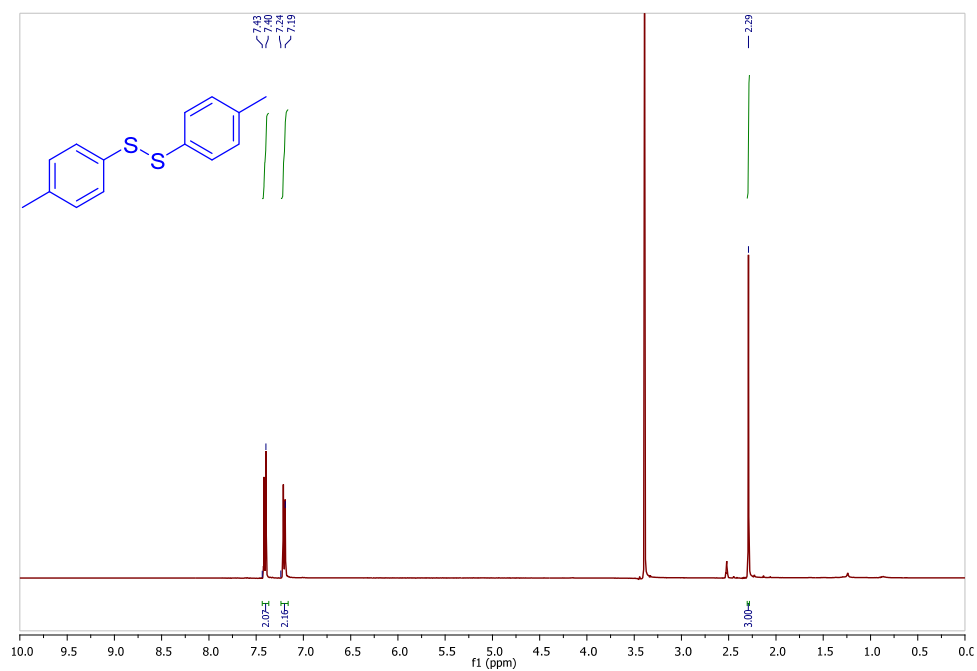

Figure S23:  $^1\text{H}$  NMR Spectra of **4**

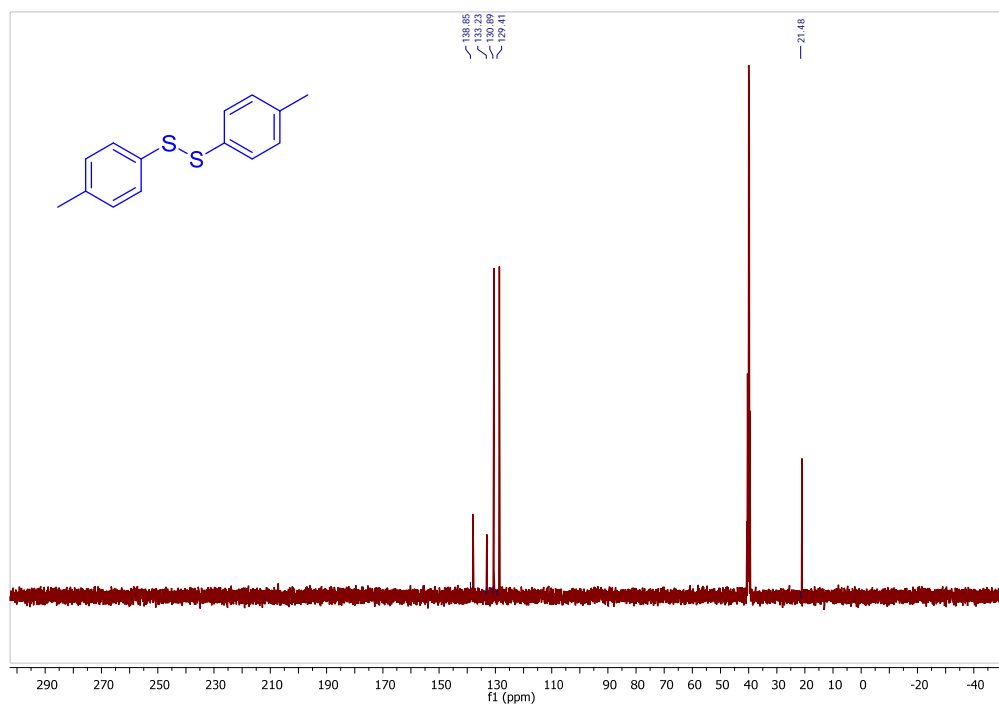

Figure S24:  $^{13}\text{C}$  NMR Spectra of **4**
